# Supplementary material for: A scoping review of the potential for chart stimulated recall as a clinical research method
Source: Springer Nature journal article supplement (doi:10.1186/s12913-017-2539-y), 2017-08-22
Supplement: MOESM1 [file 14233168]

## Additional file 1. Example search terms

Example of search terms used in CINAHL, via the EBSCOhost platform

| #         | Query                                                                                                                                                                                                                                                     | Limiters/Expanders            | Last Run Via                                                                                                            |
|-----------|-----------------------------------------------------------------------------------------------------------------------------------------------------------------------------------------------------------------------------------------------------------|-------------------------------|-------------------------------------------------------------------------------------------------------------------------|
| <b>S1</b> | TX chart-stimulated recall OR TX chart stimulated recall OR TX case-based discussion OR TX case-based oral                                                                                                                                                | Search modes - Boolean/Phrase | Interface - EBSCOhost<br>Research Databases<br>Search Screen - Advanced Search<br>Database - CINAHL Plus with Full Text |
| <b>S2</b> | TX general practice AND TX general practitioner AND TX family practice AND TX family physician AND TX family medicine AND TX primary care AND TX primary health care AND TX primary medical care AND TX primary care physician AND TX family practitioner | Search modes - Boolean/Phrase | Interface - EBSCOhost<br>Research Databases<br>Search Screen - Advanced Search<br>Database - CINAHL Plus with Full Text |
| <b>S3</b> | TX general practice OR TX general practitioner OR TX family practice OR TX family physician OR TX family medicine OR TX primary care OR TX primary health care OR TX primary medical care OR TX primary care physician OR TX family practitioner          | Search modes - Boolean/Phrase | Interface - EBSCOhost<br>Research Databases<br>Search Screen - Advanced Search<br>Database - CINAHL Plus with Full Text |
| <b>S4</b> | S1 AND S3                                                                                                                                                                                                                                                 | Search modes - Boolean/Phrase | Interface - EBSCOhost<br>Research Databases<br>Search Screen - Advanced Search<br>Database - CINAHL Plus with Full Text |
