# Supplementary material for: A scoping review of the potential for chart stimulated recall as a clinical research method
Source: Springer Nature journal article supplement (doi:10.1186/s12913-017-2539-y), 2017-08-22
Supplement: MOESM2 [file 14233168]

## Additional file 2. Data Extraction Form

|                                                                                                                     |  |
|---------------------------------------------------------------------------------------------------------------------|--|
| Author                                                                                                              |  |
| Year of publication                                                                                                 |  |
| Aims (Phenomena of Interest)                                                                                        |  |
| Setting of study                                                                                                    |  |
| Participants: how sampled <ul style="list-style-type: none"><li>• GPs (n)</li><li>• Others(profession, n)</li></ul> |  |
| How were charts chosen                                                                                              |  |
| How was topic guide/ interview schedule developed and used                                                          |  |
| Methodology for data analysis                                                                                       |  |
| Main findings                                                                                                       |  |
| How CSR was useful in generating these findings                                                                     |  |
| Duration of interviews                                                                                              |  |
| Professional background and training of interviewer                                                                 |  |
| Other issues of note (esp. potential pitfalls and how to avoid them)                                                |  |
